# Supplementary material
Source: MDPI journal article supplement (https://www.mdpi.com/2304-6740/11/4/154)
Supplement: s1 [file s1]

# Synthesis and Characterization of Green Zinc-Metal-Pillared Bentonite Mediated Curcumin Extract (Zn@CN/BE) as an Enhanced Antioxidant and Anti-Diabetes Agent

Stefano Bellucci <sup>1</sup>, Hassan Ahmed Rudayni <sup>2</sup>, Marwa H. Shemy <sup>3,4</sup>, Malak Aladwani <sup>2</sup>, Lina M. Alneghery <sup>2</sup>, Ahmed A. Allam <sup>5</sup> and Mostafa R. Abukhadra <sup>4,6,\*</sup>

<sup>1</sup> INFN-Laboratori Nazionali di Frascati, Via E. Fermi 54, 00044 Frascati, Italy; [stefano.bellucci@lnf.infn.it](mailto:stefano.bellucci@lnf.infn.it) (S.B.)

<sup>2</sup> Department of Biology, College of Science, Imam Muhammad bin Saud Islamic University, Riyadh 11623, Saudi Arabia; [HARUDAYNI@imamu.edu.sa](mailto:HARUDAYNI@imamu.edu.sa) (H.A.R.); [Moaladwani@imamu.edu.sa](mailto:Moaladwani@imamu.edu.sa) (M.A.); [imalneghery@imamu.edu.sa](mailto:imalneghery@imamu.edu.sa) (L.M.A.)

<sup>3</sup> Chemistry Department, Faculty of Science, Beni-Suef University, Beni-Suef 65211, Egypt; [marwa.h.shemy@gmail.com](mailto:marwa.h.shemy@gmail.com) (M.H.S.)

<sup>4</sup> Materials Technologies and Their Applications Lab, Geology Department, Faculty of Science, Beni-Suef University, Beni-Suef 65214, Egypt

<sup>5</sup> Zoology Department, Faculty of Science, Beni-Suef University, Beni-Suef 62514, Egypt; [Ahmed.aliahmed@science.bsu.edu.eg](mailto:Ahmed.aliahmed@science.bsu.edu.eg) (A.A.A.)

<sup>6</sup> Geology Department, Faculty of Science, Beni-Suef University, Beni-Suef 65214, Egypt; [Abukhadra89@Science.bsu.edu.eg](mailto:Abukhadra89@Science.bsu.edu.eg) (M.R.A.)

\* Correspondence: [Abukhadra89@science.bsu.edu.eg](mailto:Abukhadra89@science.bsu.edu.eg) (M.R.A.); [stefano.bellucci@lnf.infn.it](mailto:stefano.bellucci@lnf.infn.it) (S.B.)

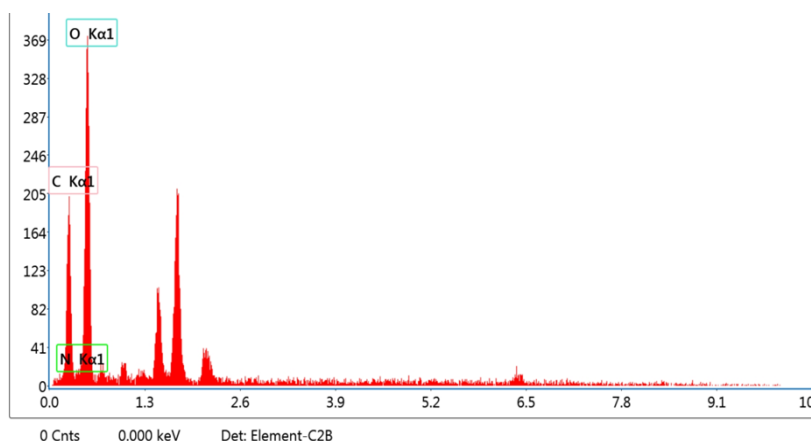

**FigureS1.** EDX spectrum of the synthetic Zn@CN/BE composite
